# Supplementary material for: Laboratory generation of new parthenogenetic lineages supports contagious parthenogenesis in Artemia
Source: PeerJ. 2014 Jun 17;2:e439. doi: 10.7717/peerj.439 (PMC4081286; doi:10.7717/peerj.439)
Supplement: Supplemental Information 1 — F1 hybrids are from parental crosses between Artemia urmiana (URM), A. sinica (SIN), A. tibetiana (TIB), Artemia sp. from Kazakhstan (KAZ) and diploid parthenogenetic Artemia rare males (PD). Live, dead and abortive individuals and number of males and females of individuals reaching maturity are given. [file peerj-02-439-s001.xls]

## Sheet: F1 PD x KAZ
F1 PD x KAZ
Female code	Live nauplii	Dead nauplii	Abortive	Total		females	males	total
A	175	0	3	178		47	42	89
B	133	20	184	337		51	48	99
	0	25	176	201
C	204	0	8	212		53	61	114
	203	0	71	274		44	48	92
D	122	4	1	127		32	29	61
E	206	0	2	208		87	89	176

## Sheet: F1 PD x URM
F1 PD x URM
Female code	Live nauplii	Dead nauplii	Abortive	Total		females	males	total
A	47	0	0	47		7	18	25
B	90	0	3	93		31	38	69
C	28	0	20	48		8	11	19
	87	0	27	114		22	34	56
D	28	0	5	33		8	4	12
E	143	0	0	143		47	41	88
	115	0	11	126		15	19	34
F	116	0	10	126		22	56	78
G	63	3	7	73		21	25	46
	81	0	3	84		29	45	74
	127	0	21	148		51	47	98
	118	2	8	128		14	32	46
H	40	0	3	43		13	7	20
	36	0	5	41		4	2	6
	121	0	17	138		17	24	41
	106	56	0	162		32	31	63
I	27	0	0	27		3	7	10
	15	0	14	29		3	2	5
L	31	3	51	85		11	3	14
	8	0	67	75		2	1	3
	78	0	30	108		18	20	38
M	150	2	17	169		52	56	108
N	115	0	23	138		33	26	59
	46	0	127	173		20	17	37
O	262	0	12	274		63	48	111
	67	35	0	102		15	5	20
	114	0	0	114		29	24	53
	163	3	25	191		76	83	159

## Sheet: F1 PD x SIN
F1 PD x SIN
Female code	Live nauplii	Dead nauplii	Abortive	Total		females	males	total
A	76	0	2	78		33	31	64
	28	4	29	61		10	10	20
B	102	0	0	102		43	39	82
C	41	32	1	74		17	16	33
	92	0	18	110		38	36	74
D	4	0	166	170		1	1	2
	205	31	58	294		84	80	164
	225	0	68	293		93	87	180
E	94	0	6	100		38	36	74
	129	0	79	208		50	50	100
	183	47	23	253		78	76	154
F	65	0	0	65		28	25	53
	125	2	8	135		52	47	99
G	126	1	0	127		49	46	95
H	138	0	44	182		55	51	106
I	285	0	0	285		116	112	228
L	212	0	2	214		81	78	159
M	74	0	16	90		30	28	58
	165	1	9	175		77	70	147
	178	0	34	212		76	97	173
N	57	0	5	62		24	22	46
	181	0	7	188		72	67	139
	243	0	4	247		97	90	187
	276	0	25	301		121	116	237
O	65	0	6	71		26	25	51
	142	0	0	142		62	59	121
	196	0	3	199		85	82	167
	272	0	1	273		108	105	213
	180	3	59	242		77	76	153
	214	0	83	297		94	88	182
P	0	8	70	78
	150	0	6	156		58	59	117
	185	0	1	186		31	44	75
	187	0	16	203		32	40	72
Q	30	0	121	151		16	13	29
	183	3	15	201		75	71	146
	212	0	57	269		26	27	53
	234	0	54	288		80	99	179
	232	4	25	261		93	93	186
R	38	2	23	63		16	16	32
	9	0	77	86		1	2	3
S	24	0	11	35		12	10	22
	138	0	5	143		54	64	118
	173	0	5	178		69	66	135
	39	0	91	130		15	15	30
	182	0	31	213		88	79	167
T	163	0	6	169		59	42	101
	193	2	12	207		99	84	183
	175	0	27	202		65	67	132
U	73	0	2	75		32	37	69
	158	0	7	165		77	74	151
	254	1	17	272		103	103	206
V	61	2	9	72		31	26	57
	133	0	14	147		64	63	127
X	69	0	18	87		34	34	68
Y	80	0	1	81		41	34	75
	132	0	28	160		51	49	100
	241	0	18	259		99	104	203
	243	0	18	261		101	97	198
	327	2	21	350		132	140	272
	198	0	7	205		96	90	186
W	29	0	56	85		12	15	27
	116	0	61	177		61	46	107
	260	0	18	278		94	114	208
	221	4	38	263		68	104	172

## Sheet: F1 PD x TIB
F1 PD x TIB
Female code	Live nauplii	Dead nauplii	Abortive	Total		females	males	total
A	89	1	4	94		25	27	52
B	60	3	42	105		15	18	33
