# Supplementary material for: Laboratory generation of new parthenogenetic lineages supports contagious parthenogenesis in Artemia
Source: PeerJ. 2014 Jun 17;2:e439. doi: 10.7717/peerj.439 (PMC4081286; doi:10.7717/peerj.439)
Supplement: Supplemental Information 2 — Number of live, dead, abortive individuals and number of males and females of individuals reaching maturity in ovoviviparous broods are given. Number of properly and improperly shelled embryos in oviparous broods are given. [file peerj-02-439-s002.xls]

## Sheet: F2 PD x KAZ
F2 PD x KAZ
Female code	Live nauplii	Dead nauplii	Abortive	Total		females	males	total		Female code	properly shelled cyst	bad cyst	Total
A	1	0	53	54						A	26	0	26
	1	3	106	110
	1	0	149	150
B	1	0	107	108						B	3	63	66
	2	2	157	161
	7	1	182	190
C	4	1	37	42						C	81	97	178
	1	0	68	69
	5	7	149	161
D	7	2	149	158
	2	0	194	196
	1	0	247	248
	7	2	198	207
E	1	0	48	49
	5	0	164	169
F	7	0	59	66
	48	12	137	197		10	0	10
G	2	0	171	173
	7	0	168	175
H	0	2	71	73
	43	12	129	184		10	2	12
	1	0	206	207
I	2	0	125	127						I	88	93	181
	1	0	163	164
	28	4	145	177		7	8	15
L	1	0	83	84
	1	1	172	174
M	89	22	87	198		20	0	20
N	61	0	167	228		4	0	4
	114	0	106	220		64	2	66
O	0	1	73	74
P	48	0	111	159		31	1	32		P	139	52	191
Q	1	0	48	49
	1	0	106	107
R	1	0	142	143
S										S	49	59	108
T	1	0	152	153

## Sheet: F2 PD X URM
F2 PD x URM
Female code	Live nauplii	Dead nauplii	Abortive	Total		females	males	total		Female code	properly shelled cyst	bad cyst	Total
A	1	0	74	75						A	32	60	92
	0	2	122	124							43	62	105
											50	76	126
B	0	2	168	170						B	69	13	82
C	7	0	92	99
	11	3	124	138
	5	0	130	135
	1	0	170	171
D	46	0	143	189		16	3	19
E	4	0	123	127
F	45	0	86	131		2	4	6
G	1	0	50	51
H	3	1	164	168
I	2	0	83	85
L	6	2	56	64
	17	1	47	65		2	0	2
M	1	0	98	99
	19	4	132	155		3	1	4
N	14	1	112	127		2	1	3
0	9	2	74	85
P	24	12	87	123		2	0	2
Q	1	0	102	103
R	28	9	102	139		13	2	15

## Sheet: F2 PD X SIN
F2 Pd x SIN
Female code	Live nauplii	Dead nauplii	Abortive	Total		females	males	total		Female code	properly shelled cyst	bad cyst	Total
A	86	1	82	169		4	4	8		A	96	73	169
	143	17	82	242		6	6	12			154	125	279
	22	3	142	167		5	3	8
B	123	5	68	196		6	15	21		B	145	39	184
	51	154	101	306		7	9	16
C	89	0	89	178		6	3	9		C	70	88	158
	0	1	95	96
	52	7	42	101		1	3	4
D	1	0	243	244						D
	10	2	112	124
E										E	34	82	116
											87	54	141
											93	70	163
											111	67	178
											52	31	83
											93	64	157
F	25	2	148	175		1	1	2		F	5	69	74
	36	2	182	220		4	5	9			34	67	101
	44	4	141	189		9	6	15
	64	19	91	174		14	12	26
G	38	51	199	288						G	5	164	169
H	44	0	214	258		10	10	20		H	30	118	148
	67	16	168	251							47	79	126
I	1	0	227	228						I	27	77	104
	0	5	254	259							22	75	97
											14	72	86
L	36	0	110	146		5	6	11		L	9	130	139
	64	3	171	238		15	12	27			158	76	234
M	139	24	130	293		23	24	47		M	80	119	199
											10	136	146
											197	74	271
N	98	4	42	144		8	17	25		N	73	86	159
	134	19	45	198		22	24	46			116	47	163
	148	25	64	237
O	26	13	78	117						O	12	117	129
											77	51	128
											175	47	222
P	11	3	74	88						P	31	64	95
	19	25	147	191							47	69	116
	196	0	3	199
Q	29	6	188	223		5	8	13		Q	82	147	229
R	69	8	144	221						R	128	95	223
											129	118	247
											223	16	239
S	6	0	121	127						S
	18	0	228	246		16	0	16
	22	1	161	184
	1	2	171	174
T										T	35	182	217
											74	185	259
											191	77	268
											140	87	227
U	7	0	191	198						U	70	86	156
V	15	0	201	216		7	0	7		V	105	109	214
											183	70	253
											86	79	165
											141	84	225
Z	32	1	185	218		4	1	5		Z	18	161	179
	24	0	220	244							117	112	229
J	121	22	97	240		14	21	35		J	181	70	251
											208	41	249

## Sheet: F2 PD X TIB
F2 PD x TIB
Female code	Live nauplii	Dead nauplii	Abortive	Total		females	males	total		Female code	properly shelled cyst	bad cyst	Total
A	0	10	69	79		0	0	0		A	12	42	54
B	2	5	72	79		0	0	0		B	21	97	118
C										C	24	63	87
											12	82	94
D	5	0	67	72		0	0	0		D	15	32	47
											20	87	107
E										E	18	26	44
F										F	9	55	64
G										G	33	79	112
H	7	0	49	56		0	0	0		H	31	64	95
											27	103	130
I										I	11	50	61
											23	64	87
L										L	28	53	81
